# Supplementary material
Source: MDPI journal article supplement (https://www.mdpi.com/2076-0760/10/10/373)
Supplement: s1 [file s1]

Archive with 2 entries (2 files):
- Table S1 Pattern of missingness.pdf
- Table S2 Diagnostic sample characteristics.pdf
