# Supplementary material
Source: MDPI journal article supplement (https://www.mdpi.com/2076-0760/10/10/373)
Supplement: s1 [file s1 › Table S1 Pattern of missingness.pdf]

## Supplementary Files

Table S1 Pattern of missingness

| Number of cases<br>(N = 129) | Age | Gender | CDI T0 | SRT T0 | YSR int<br>T0 | YSR ext<br>T0 | CDI T3 | SRT T3 | YSR int<br>T3 | YSR ext<br>T3 | CDI T5 | SRT T5 | YSR int<br>T5 | YSR ext<br>T5 | Complete cases<br>if variables<br>missing in that<br>pattern are not<br>used |
|------------------------------|-----|--------|--------|--------|---------------|---------------|--------|--------|---------------|---------------|--------|--------|---------------|---------------|------------------------------------------------------------------------------|
| 33                           |     |        |        |        |               |               |        |        |               |               |        |        |               |               | 33                                                                           |
| 2                            |     |        |        | X      | X             | X             |        |        |               |               |        |        |               |               | 35                                                                           |
| 2                            |     |        |        |        |               |               | X      | X      | X             | X             |        |        |               |               | 35                                                                           |
| 10                           |     |        |        | X      |               |               | X      | X      | X             | X             | X      | X      | X             | X             | 112                                                                          |
| 37                           |     |        |        |        |               |               | X      | X      | X             | X             | X      | X      | X             | X             | 102                                                                          |
| 4                            |     |        | X      |        | X             | X             | X      | X      | X             | X             | X      | X      | X             | X             | 111                                                                          |
| 2                            |     |        |        |        | X             | X             | X      | X      | X             | X             | X      | X      | X             | X             | 104                                                                          |
| 5                            |     |        | X      | X      | X             | X             | X      | X      | X             | X             | X      | X      | X             | X             | 129                                                                          |
| 2                            |     |        |        |        |               |               |        | X      |               |               | X      | X      | X             | X             | 62                                                                           |
| 27                           |     |        |        |        |               |               |        |        |               |               | X      | X      | X             | X             | 60                                                                           |
