# Supplementary material
Source: MDPI journal article supplement (https://www.mdpi.com/2076-0760/10/10/373)
Supplement: s1 [file s1 › Table S2 Diagnostic sample characteristics.pdf]

## Supplementary Files

Table S2 Diagnostic sample characteristics

|                                                    | Blended CBT<br>( <i>n</i> = 37) | Face-to-face<br>CBT<br>( <i>n</i> = 44) | TAU<br>( <i>n</i> = 40) | Blended CBT vs.<br>Face-to-face CBT |          | Blended CBT vs.<br>TAU |          |
|----------------------------------------------------|---------------------------------|-----------------------------------------|-------------------------|-------------------------------------|----------|------------------------|----------|
|                                                    | <i>n</i> (%)                    | <i>n</i> (%)                            | <i>n</i> (%)            | $\chi^2$                            | <i>p</i> | $\chi^2$               | <i>p</i> |
| Depressive disorder (MDD<br>or Dysthymic disorder) | 37 (100%)                       | 44 (100%)                               | 40 (100%)               | *                                   |          | *                      |          |
| Bipolar disorder                                   | 0                               | 0                                       | 0                       | *                                   |          | *                      |          |
| Psychotic disorder                                 | 0                               | 2 (4.5%)                                | 0                       | 1.72                                | .19      | *                      |          |
| Panic disorder                                     | 1 (2.7%)                        | 4 (9.1%)                                | 1 (2.5%)                | 1.42                                | .23      | .003                   | .96      |
| Social phobia                                      | 1 (2.7%)                        | 13 (29.5%)                              | 8 (20.0%)               | 10.13                               | .001     | 5.57                   | .02      |
| Specific phobia                                    | 1 (2.7%)                        | 4 (9.1%)                                | 3 (7.5%)                | 1.42                                | .23      | .90                    | .34      |
| Separation anxiety                                 | 1 (2.7%)                        | 2 (4.5%)                                | 2 (5.0%)                | 1.91                                | .66      | .27                    | .60      |
| Generalized Anxiety<br>Disorder                    | 12 (32.4%)                      | 14 (31.8%)                              | 9 (22.5%)               | .003                                | .95      | .96                    | .33      |
| PTSD                                               | 1 (2.7%)                        | 3 (6.8%)                                | 3 (7.5%)                | .73                                 | .39      | .90                    | .34      |
| Acute Stress Disorder                              | 0                               | 0                                       | 1 (2.5%)                | *                                   |          | .94                    | .33      |
| OCD                                                | 0                               | 0                                       | 0                       | *                                   |          | *                      |          |
| Anorexia Nervosa                                   | 0                               | 1 (2.3%)                                | 0                       | .85                                 | .36      | *                      |          |
| Bulimia Nervosa                                    | 0                               | 1 (2.3%)                                | 0                       | .85                                 | .36      | *                      |          |
| ADHD                                               | 5 (13.5%)                       | 6 (13.6%)                               | 5 (12.5%)               | 0                                   | .99      | .02                    | .90      |
| Conduct Disorder                                   | 0                               | 0                                       | 0                       | *                                   |          | *                      |          |
| ODD                                                | 0                               | 1 (2.3%)                                | 1 (2.5%)                | .85                                 | .36      | .94                    | .33      |
| Tic disorder                                       | 1 (2.7%)                        | 0                                       | 0                       | 1.20                                | .27      | 1.10                   | .30      |

Note. \* $\chi^2$  was not calculated due to constant values.
